# Supplementary material for: Pseudotumoral Presentation of Cerebral Amyloid-Beta Angiopathy: Case Report and Review of Literature
Source: PubMed Central journal article supplement — Psychiatry Investig. 2021 Jun 17;18(6):479–85. doi: 10.30773/pi.2020.0201 (PMC8256143; doi:10.30773/pi.2020.0201), 2021-06-17
Supplement: pi-2020-0201-suppl.pdf [file pi-2020-0201-suppl.pdf]

**Supplementary Table 1.** Pseudotumoral amyloid angiopathy cases reported in literature (Modified from<sup>10</sup>)

| Publication/<br>case number      | Age<br>sex | Clinical<br>presentation                                        | T2/FLAIR                                                       | T1 Gd    | T2 GRE                         | H-MRS | Histology                     | Drugs<br>treatment             | Outcome/<br>follow up                          |
|----------------------------------|------------|-----------------------------------------------------------------|----------------------------------------------------------------|----------|--------------------------------|-------|-------------------------------|--------------------------------|------------------------------------------------|
| Mandybur 1992 <sup>40</sup>      |            |                                                                 |                                                                |          |                                |       |                               |                                |                                                |
| 1                                | 62F        | Confusion                                                       | Isolated, Infiltrative HI                                      | No CE    | -                              | -     | Biopsy: CAA-RI                | Steroids+CP                    | Favorable                                      |
| Osumi 1995 <sup>12</sup>         |            |                                                                 |                                                                |          |                                |       |                               |                                |                                                |
| 2                                | 59F        | Headache, motor deficit                                         | Isolated, Infiltrative HI (T)                                  | No CE    | -                              | -     | Surgery: CAA                  | Steroids                       | Death/5 months                                 |
| Ortiz 1996 <sup>41</sup>         |            |                                                                 |                                                                |          |                                |       |                               |                                |                                                |
| 3                                | 64F        | Confusion, headache                                             | Isolated, Infiltrative HI                                      | No CE    | -                              | -     | Biopsy: CAA                   | Steroids                       | Favorable                                      |
| Fountain 1996 <sup>42</sup>      |            |                                                                 |                                                                |          |                                |       |                               |                                |                                                |
| 4                                | 66M        | Confusion, cognitive decline, aphasia                           | Multiple, Infiltrative HI                                      | No CE    | -                              | -     | Biopsy: CAA-RI                | Steroids, CP                   | Stable                                         |
| Polivka 1999 <sup>13</sup>       |            |                                                                 |                                                                |          |                                |       |                               |                                |                                                |
| 5                                | 60M        | Headache                                                        | Isolated, Infiltrative HI                                      | No CE    | -                              | -     | Surgery: CAA-RI               | None                           | Favorable/5 years                              |
| 6                                | 74F        | Sensori-motor deficit                                           | Isolated, Infiltrative HI                                      | CE       | -                              | -     | Surgery: CAA-RI               | None                           | NI                                             |
| De Broucker 2000 <sup>14</sup>   |            |                                                                 |                                                                |          |                                |       |                               |                                |                                                |
| 7                                | 64F        | Seizures                                                        | Isolated, Infiltrative HI                                      | No CE    |                                |       | Biopsy: CAA                   | None                           | Favorable/2 years                              |
| 8                                | 69F        | Aphasia, motor deficit                                          | Isolated, Infiltrative HI                                      | LCE      | MB                             |       | Biopsy: CAA                   | None                           | Favorable/1 year                               |
| Caulo 2001 <sup>23</sup>         |            |                                                                 |                                                                |          |                                |       |                               |                                |                                                |
| 9                                | 41M        | Headache, seizure                                               | Bilateral infiltrative HI (FTPO)                               | No CE    | -                              | -     | Biopsy: CAA                   | None                           | NI/1 year                                      |
| Oide 2002 <sup>15</sup>          |            |                                                                 |                                                                |          |                                |       |                               |                                |                                                |
| 10                               | 69M        | Cognitive decline, seizure                                      | Multiple, extensive HI                                         | No       | -                              | -     | Biopsy: CAA-RI                | None                           | Ongoing deterioration                          |
| Schwab 2003 <sup>43</sup>        |            |                                                                 |                                                                |          |                                |       |                               |                                |                                                |
| 11                               | 74M        | Cognitive decline, seizure                                      | Infiltrative HI                                                | LCE      | -                              | -     | Biopsy: CAA-RI                | Steroids                       | Favorable/1 year                               |
| 12                               | 70F        | Seizure                                                         | Infiltrative HI                                                | LCE      | -                              | -     | Biopsy: CAA-RI                | Steroids+CP                    | Favorable/1 year                               |
| Tamargo 2003 <sup>44</sup>       |            |                                                                 |                                                                |          |                                |       |                               |                                |                                                |
| 13                               | 80F        | Confusion, aphasia, hemineglect                                 | Multiple, Infiltrative HI                                      | Mild CE  | -                              | N     | Biopsy: CAA-RI                | Steroids                       | Favorable/1 year                               |
| Vandermissen 2003 <sup>26</sup>  |            |                                                                 |                                                                |          |                                |       |                               |                                |                                                |
| 14                               | 46M        | Cognitive decline                                               | Isolated, Infiltrative HI                                      | No CE    | -                              |       | Biopsy: CAA                   | None                           | Stable/11 years                                |
| Safriel 2004 <sup>16</sup>       |            |                                                                 |                                                                |          |                                |       |                               |                                |                                                |
| 15                               | 49M        | Seizure                                                         | Isolated, Infiltrative HI (TO)                                 | No CE    | -                              | N     | Surgery: CAA-RI               | Steroids                       | Favorable/9 months                             |
| 16                               | 71F        | Cognitive deterioration                                         | Isolated, Infiltrative HI (PO)                                 | No CE    | -                              | N     | Biopsy: CAA-RI                | None                           | Ongoing deterioration/<br>11 years             |
| Mulvey 2005 <sup>21</sup>        |            |                                                                 |                                                                |          |                                |       |                               |                                |                                                |
| 17                               | 53M        | Hemiparesis<br>Headaches<br>Seizure                             | Bilateral extensive HI (FTPO)                                  | No CE    | -                              | -     | Surgery: CAA                  | Steroids                       | NI                                             |
| Scolding 2005 <sup>29</sup>      |            |                                                                 |                                                                |          |                                |       |                               |                                |                                                |
| 18                               | 70F        | Confusion, hallucinations, reduced conscious level              | Temporal lobe swelling Multifocal WM lesions in occipital lobe | CE       |                                |       | Biopsy: CAA-RI                | Steroids+CP                    | Favorable                                      |
| 19                               | 72M        | Hemiparesis<br>Confusion<br>Dysphasia<br>Dyspraxia              | Isolated FP diffuse WM HI with mass effect                     | No CE    |                                |       | Surgery: CAA-RI               | Steroids                       | Death                                          |
| Andrade 2006 <sup>17</sup>       |            |                                                                 |                                                                |          |                                |       |                               |                                |                                                |
| 20                               | 45M        | Seizure                                                         | Isolated, Infiltrative HI (F)                                  | No CE    | -                              | -     | Surgery: CAA                  | None                           | Favorable/6 months                             |
| Mikolaenko 2006 <sup>25</sup>    |            |                                                                 |                                                                |          |                                |       |                               |                                |                                                |
| 21                               | 50M        | Seizure                                                         | Well-circumscri-bed isolated (F)                               | Mild CE  | -                              | -     | Surgery: CAA-RI               | None                           | Favorable                                      |
| Wong 2006 <sup>39</sup>          |            |                                                                 |                                                                |          |                                |       |                               |                                |                                                |
| 22                               | 79F        | Subtle cognitive dysfunction                                    | Bilateral WM HI (FTP)                                          | Mild CE  | -                              | -     | Biopsy: CAA-RI                | Steroids+MTTX                  | Favorable (1 recidive)                         |
| McHugh 2007 <sup>27</sup>        |            |                                                                 |                                                                |          |                                |       |                               |                                |                                                |
| 23                               | 80F        | Seizures, aphasia, hemianopia, hemiparesis                      | Bilateral diffuse HI WM (F)                                    | No CE    | MB                             |       | Biopsy: CAA-RI                | Steroids                       | Favorable (2 recidives)/<br>24 months          |
| Kloppenborg 2010 <sup>45</sup>   |            |                                                                 |                                                                |          |                                |       |                               |                                |                                                |
| 24                               | 74M        | Gait disorder, sleepiness seizure, confusion                    | Bilateral WM HI (F)                                            | Mild CE  |                                |       | Biopsy: CAA-RI                | Steroids                       | Favorable                                      |
| Morishige 2010 <sup>22</sup>     |            |                                                                 |                                                                |          |                                |       |                               |                                |                                                |
| 25                               | 78F        | Aphasia<br>Cognitive decline                                    | Unilateral WM HI (F)                                           | Mild CE  | - NI                           | -     | Biopsy: CAA-RI                | Steroids                       | Favorable/ 24 months                           |
| Bekkelund 2011 <sup>20</sup>     |            |                                                                 |                                                                |          |                                |       |                               |                                |                                                |
| 26                               | 57M        | Crural monoparesis                                              | Unilateral hemispheric HI lesion (FTPO)                        | LCE      | MB                             |       | Biopsy: CAA-RI                | Steroids+CP                    | Favorable (1 recidive)/<br>15 months           |
| Karbowiczek 2012 <sup>18</sup>   |            |                                                                 |                                                                |          |                                |       |                               |                                |                                                |
| 27                               | 64F        | Cognitive decline                                               | Two well-delimited HI                                          | No CE    | -                              | -     | Surgery: CAA                  | None                           | Cognitive deterioration                        |
| 28                               | 38M        | Headache, hemiparesis, aphasia                                  | Well-delimited HI                                              | No CE    | -                              | -     | Surgery: CAA                  | None                           | Favorable                                      |
| Kotsenas 2013 <sup>19</sup>      |            |                                                                 |                                                                |          |                                |       |                               |                                |                                                |
| 29                               | 63F        | Confusion, cognitive decline, motor and visual deficit, seizure | Isolated, Infiltrative HI (TPO)                                | Mild LCE | MB                             |       | Biopsy: Vascular inflammation | Steroids in 3 patients         | Favorable                                      |
| 30                               | 62F        | Sensitive deficit                                               | Isolated, Infiltrative HI (P)                                  | Avid LCE | MB SS                          | -     | Biopsy: CAA                   |                                | Favorable                                      |
| 31                               | 77M        | Confusion, cognitive decline, aphasia                           | Isolated, Infiltrative HI (FP)                                 | No CE    | MB SS                          | -     | Biopsy: Vascular inflammation | None in 2 patients             | Favorable                                      |
| 32                               | 74M        | Confusion, cognitive decline                                    | Isolated, Infiltrative HI (PO)                                 | Mild LCE | MB                             | -     | Biopsy: CAA-RI                |                                | Favorable                                      |
| 33                               | 71F        | Confusion, cognitive decline, headaches                         | Isolated, Infiltrative HI lesion (TPO)                         | Avid LCE | MB                             | -     | Biopsy: CAA-RI                |                                | Favorable                                      |
| Danve 2014 <sup>9</sup>          |            |                                                                 |                                                                |          |                                |       |                               |                                |                                                |
| 34                               | 63F        | Seizure                                                         | Multiple and bilateral HI lesions (FT)                         | Mild CE  | MB within lesion               | -     | Biopsy: CAA-RI                | Steroids+CP/<br>Micopheno late | Favorable/11 months                            |
| Franco-Macias 2016 <sup>11</sup> |            |                                                                 |                                                                |          |                                |       |                               |                                |                                                |
| 35                               | 67F        | Aphasia<br>Hemiparesis<br>Seizure                               | Unilateral extense HI lesion (FTP)                             | LCE      | No MB.<br>SS+Old he<br>mato ma |       | Biopsy: CAA-RI                | Steroids                       | Stable (persistent aphasia, cognitive decline) |
| Ronsin 2016 <sup>10</sup>        |            |                                                                 |                                                                |          |                                |       |                               |                                |                                                |
| 36                               | 70M        | Confusion                                                       | Multiple , bilateral, asymmetric HI ST WM lesions (FTO)        | LCE      | MB, SS                         | -     | Biopsy: CAA                   | Steroids                       | Death (ICH)/3 months                           |
| 37                               | 80M        | Subacute cognitive decline                                      | Multiple , bilateral, asymmetric HI ST WM lesions (FTO)        | No CE    | MB, SS                         | N     | -                             | Steroids                       | Favorable /12 months                           |
| 38                               | 63M        | Subacute cognitive decline and motor deficit                    | Bilateral, asymmetric HI ST WM lesions (PO)                    | No CE    | MB                             | N     | -                             | Steroids                       | Favorable /24 months                           |
| 39                               | 82M        | Subacute cognitive decline and headache                         | Isolated HI ST WM lesion (PO)                                  | LCE      | MB, SS                         | N     | -                             | Steroids                       | Favorable /18 months                           |
| 40                               | 63M        | Subacute cognitive decline and headache                         | Extense confluent bilateral asymmetric HI ST WM lesions (FPO)  | No CE    | MB, SS                         | N     | -                             | None                           | Favorable /12 months                           |
| Tolchin 2016 <sup>24</sup>       |            |                                                                 |                                                                |          |                                |       |                               |                                |                                                |
| 41                               | 52M        | Confusion, paranoia. Non convulsive status epilepticus          | Multiple, bilateral, asymmetric HI ST WM lesions (FTO)         | No CE    | MB                             | -     | Biopsy: CAA                   | Steroids                       | Favorable/UK                                   |
| Our patient                      |            |                                                                 |                                                                |          |                                |       |                               |                                |                                                |
| 42                               | 54M        | Acute aphasia, seizure                                          | Isolated, Infiltrative HI (T)                                  | No CE    | MB inside the lesion           | N     | Surgery: CAA-RI               | Steroids                       | Favorable/24 months                            |

CAA-RI: Cerebral  $\beta$  amyloid angiopathy related angitis, CAA: cerebral amyloid angiopathy, CE: contrast enhancement, CP: cyclophosphamide, DWI: diffusion weighted imaging, F: Frontal, HI: hyperintense, ICH (intra-cerebral hemorrhage), IT: infratentorial, LCE: leptomenigeal contrast enhancement, M: male, MB: microbleeds, H-MRS: MRI spectroscopy, MTTX: methotrexate, N: normal, ND: non diagnostic, O: Occipital, P: Parietal, SS: superficial siderosis, ST: supratentorial, T: Temporal, WM: white matter
